# Supplementary material for: Is Less Always More? A Prospective Two-Centre Study Addressing Clinical Outcomes in Leadless versus Transvenous Single-Chamber Pacemaker Recipients
Source: MDPI journal article supplement (doi:10.3390/jcm11206071), 2022-10-14
Supplement: s1 [file s1]

**Supplementary material legend:**

Videos documenting the single episode of leadless VVIR pacemaker dislodgement and its management.

- Supplementary material 1: Leadless pacemaker stability testing.
- Supplementary material 2: Dislodgement below the tricuspid valve.
- Supplementary material 3: Pacemaker dislodged into right atrium.
- Supplementary material 4: Retrieval of leadless device.
