# Supplementary material for: Is Less Always More? A Prospective Two-Centre Study Addressing Clinical Outcomes in Leadless versus Transvenous Single-Chamber Pacemaker Recipients
Source: J Clin Med. 2022 Oct 14;11(20):6071. doi: 10.3390/jcm11206071 (PMC9604678; doi:10.3390/jcm11206071)
Supplement: Supplementary file 1 [file jcm-11-06071-s001.zip]

Archive with 5 entries (5 files):
- jcm-1958668-supplementary.pdf
- Supplementary material 1.  stability testing - Copia.avi
- Supplementary material 2.  dislodgement below the tricuspid valve - Copia.mp4
- Supplementary material 3. pacemaker dislodged into the Right Atrium.mp4
- Supplementary material 4. Retrieval of Micra_compressed.mp4
